# Supplementary material for: Establishment of a simplified dichotomic size‐exclusion chromatography for isolating extracellular vesicles toward clinical applications
Source: PubMed Central journal article supplement — J Extracell Vesicles. 2021 Sep 12;10(11):e12145. doi: 10.1002/jev2.12145 (PMC8435528; doi:10.1002/jev2.12145), 2021-09-12
Supplement: JEV2-10-e12145-s003.pdf [file JEV2-10-e12145-s003.pdf]

| Sample type                          |          | Resin type                                                                          |                                                                                              | 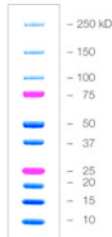<br>Protein ladder<br>- 250 kD<br>- 150<br>- 100<br>- 75<br>- 50<br>- 37<br>- 25<br>- 20<br>- 15<br>- 10 |                                                                                                 |
|--------------------------------------|----------|-------------------------------------------------------------------------------------|----------------------------------------------------------------------------------------------|--------------------------------------------------------------------------------------------------------------------------------------------------------------------------------------------|-------------------------------------------------------------------------------------------------|
| Human serum                          |          | CL-2B                                                                               |                                                                                              |                                                                                                                                                                                            |                                                                                                 |
| Isolation method                     |          | Bed volumn                                                                          |                                                                                              |                                                                                                                                                                                            |                                                                                                 |
| Regular SEC                          |          | 10 mL                                                                               |                                                                                              |                                                                                                                                                                                            |                                                                                                 |
| Target antigen<br>(Molecular weight) | Fraction | Bright field                                                                        | Short exposure                                                                               | Bright field                                                                                                                                                                               | Long exposure                                                                                   |
| Integrin $\beta 3$<br>(100 kDa)      | 1-13     |    | <br>1 min   |                                                                                                          | <br>10 min   |
| Integrin $\beta 3$<br>(100 kDa)      | 14-26    |    | <br>3 min   |                                                                                                          | <br>15 min   |
| Syntenin<br>(32 kDa)                 | 1-13     |    | <br>1 min   |                                                                                                          | <br>40 min   |
| Syntenin<br>(32 kDa)                 | 14-26    |   | <br>5 min  |                                                                                                         | <br>20 min  |
| Albumin<br>(69 kDa)                  | 1-13     |  | <br>10 s  |                                                                                                        | <br>5 min  |
| Albumin<br>(69 kDa)                  | 14-26    |  | <br>10 s  |                                                                                                        | <br>5 min  |
| ApoA1<br>(27 kDa)                    | 1-13     |  | <br>3 min |                                                                                                        | <br>10 min |
| ApoA1<br>(27 kDa)                    | 14-26    |  | <br>30 s  |                                                                                                        | <br>10 min |
| ApoB<br>(512 kDa)                    | 1-13     |  | <br>10 s  |                                                                                                        | <br>10 min |
| ApoB<br>(512 kDa)                    | 14-26    |  | <br>10 s  |                                                                                                        | <br>5 min  |

| Sample type                          |          | Resin type   |                |              |               |  |
|--------------------------------------|----------|--------------|----------------|--------------|---------------|--|
| Human serum                          |          | CL-4B        |                |              |               |  |
| Isolation method                     |          | Bed volumn   |                |              |               |  |
| Regular SEC                          |          | 10 mL        |                |              |               |  |
| Target antigen<br>(Molecular weight) | Fraction | Bright field | Short exposure | Bright field | Long exposure |  |
| Integrin $\beta$ 3<br>(100 kDa)      | 1-13     |              | <br>15 s       |              | <br>5 min     |  |
| Integrin $\beta$ 3<br>(100 kDa)      | 14-26    |              | <br>1 min      |              | <br>10 min    |  |
| Syntenin<br>(32 kDa)                 | 1-13     |              | <br>1 min      |              | <br>10 min    |  |
| Syntenin<br>(32 kDa)                 | 14-26    |              | <br>5 min      |              | <br>15 min    |  |
| Albumin<br>(69 kDa)                  | 1-13     |              | <br>30 s       |              | <br>10 min    |  |
| Albumin<br>(69 kDa)                  | 14-26    |              | <br>30 s       |              | <br>5 min     |  |
| ApoA1<br>(27 kDa)                    | 1-13     |              | <br>5 min      |              | <br>20 min    |  |
| ApoA1<br>(27 kDa)                    | 14-26    |              | <br>5 min      |              | <br>10 min    |  |
| ApoB<br>(512 kDa)                    | 1-13     |              | <br>10 s       |              | <br>5 min     |  |
| ApoB<br>(512 kDa)                    | 14-26    |              | <br>3 s        |              | <br>5 min     |  |

| Sample type                       |          | Resin type   |                |              |               |  |
|-----------------------------------|----------|--------------|----------------|--------------|---------------|--|
| Human serum                       |          | CL-6B        |                |              |               |  |
| Isolation method                  |          | Bed volumn   |                |              |               |  |
| Regular SEC                       |          | 10 mL        |                |              |               |  |
| Target antigen (Molecular weight) | Fraction | Bright field | Short exposure | Bright field | Long exposure |  |
| Integrin $\beta$ 3 (100 kDa)      | 1-13     |              |                |              |               |  |
| Integrin $\beta$ 3 (100 kDa)      | 14-26    |              |                |              |               |  |
| Syntenin (32 kDa)                 | 1-13     |              |                |              |               |  |
| Syntenin (32 kDa)                 | 14-26    |              |                |              |               |  |
| Albumin (69 kDa)                  | 1-13     |              |                |              |               |  |
| Albumin (69 kDa)                  | 14-26    |              |                |              |               |  |
| ApoA1 (27 kDa)                    | 1-13     |              |                |              |               |  |
| ApoA1 (27 kDa)                    | 14-26    |              |                |              |               |  |
| ApoB (512 kDa)                    | 1-13     |              |                |              |               |  |
| ApoB (512 kDa)                    | 14-26    |              |                |              |               |  |

| Sample type                          |          | Resin type   |                                                         |              |                                                         |  |
|--------------------------------------|----------|--------------|---------------------------------------------------------|--------------|---------------------------------------------------------|--|
| Human serum                          |          | CL-4B        |                                                         |              |                                                         |  |
| Isolation method                     |          | Bed volumn   |                                                         |              |                                                         |  |
| Regular SEC                          |          | 20 mL        |                                                         |              |                                                         |  |
| Target antigen<br>(Molecular weight) | Fraction | Bright field | Short exposure                                          | Bright field | Long exposure                                           |  |
| Integrin $\beta$ 3<br>(100 kDa)      | 1-13     |              | <br>HS 1 2 3 4 5 6 7 8 9 10 11 12 13<br>1 min           |              | <br>HS 1 2 3 4 5 6 7 8 9 10 11 12 13<br>20 min          |  |
|                                      | 14-26    |              | <br>14 15 16 17 18 19 20 21 22 23 24 25 26 HS<br>10 min |              | <br>14 15 16 17 18 19 20 21 22 23 24 25 26 HS<br>30 min |  |
| Integrin $\beta$ 3<br>(100 kDa)      | 27-39    |              | <br>13 27 28 29 30 31 32 33 34 35 36 37 38 39<br>5 min  |              | <br>13 27 28 29 30 31 32 33 34 35 36 37 38 39<br>20 min |  |
|                                      | 40-52    |              | <br>40 41 42 43 44 45 46 47 48 49 50 51 52 13<br>10 min |              | <br>40 41 42 43 44 45 46 47 48 49 50 51 52 13<br>20 min |  |
| Syntenin<br>(32 kDa)                 | 1-13     |              | <br>HS 1 2 3 4 5 6 7 8 9 10 11 12 13<br>5 min           |              | <br>HS 1 2 3 4 5 6 7 8 9 10 11 12 13<br>30 min          |  |
|                                      | 14-26    |              | <br>14 15 16 17 18 19 20 21 22 23 24 25 26 HS<br>5 min  |              | <br>14 15 16 17 18 19 20 21 22 23 24 25 26 HS<br>20 min |  |
| Syntenin<br>(32 kDa)                 | 27-39    |              | <br>13 27 28 29 30 31 32 33 34 35 36 37 38 39<br>5 min  |              | <br>13 27 28 29 30 31 32 33 34 35 36 37 38 39<br>15 min |  |
|                                      | 40-52    |              | <br>40 41 42 43 44 45 46 47 48 49 50 51 52 13<br>5 min  |              | <br>40 41 42 43 44 45 46 47 48 49 50 51 52 13<br>15 min |  |

| Sample type                          |          | Resin type   |                                                         |              |                                                         |
|--------------------------------------|----------|--------------|---------------------------------------------------------|--------------|---------------------------------------------------------|
| Human serum                          |          | CL-4B        |                                                         |              |                                                         |
| Isolation method                     |          | Bed volumn   |                                                         |              |                                                         |
| Regular SEC                          |          | 20 mL        |                                                         |              |                                                         |
| Target antigen<br>(Molecular weight) | Fraction | Bright field | Short exposure                                          | Bright field | Long exposure                                           |
| Albumin<br>(69 kDa)                  | 1-13     |              | <br>HS 1 2 3 4 5 6 7 8 9 10 11 12 13<br>10 min          |              | <br>HS 1 2 3 4 5 6 7 8 9 10 11 12 13<br>15 min          |
| Albumin<br>(69 kDa)                  | 14-26    |              | <br>14 15 16 17 18 19 20 21 22 23 24 25 26HS<br>1 min   |              | <br>14 15 16 17 18 19 20 21 22 23 24 25 26HS<br>10 min  |
| Albumin<br>(69 kDa)                  | 27-39    |              | <br>13 27 28 29 30 31 32 33 34 35 36 37 38 39<br>1 min  |              | <br>13 27 28 29 30 31 32 33 34 35 36 37 38 39<br>15 min |
| Albumin<br>(69 kDa)                  | 40-52    |              | <br>40 41 42 43 44 45 46 47 48 49 50 51 52 13<br>1 min  |              | <br>40 41 42 43 44 45 46 47 48 49 50 51 52 13<br>15 min |
| ApoA1<br>(27 kDa)                    | 1-13     |              | <br>HS 1 2 3 4 5 6 7 8 9 10 11 12 13<br>1 min           |              | <br>HS 1 2 3 4 5 6 7 8 9 10 11 12 13<br>5 min           |
| ApoA1<br>(27 kDa)                    | 14-26    |              | <br>14 15 16 17 18 19 20 21 22 23 24 25 26HS<br>30 s    |              | <br>14 15 16 17 18 19 20 21 22 23 24 25 26HS<br>5 min   |
| ApoA1<br>(27 kDa)                    | 27-39    |              | <br>13 27 28 29 30 31 32 33 34 35 36 37 38 39<br>1 min  |              | <br>13 27 28 29 30 31 32 33 34 35 36 37 38 39<br>10 min |
| ApoA1<br>(27 kDa)                    | 40-52    |              | <br>40 41 42 43 44 45 46 47 48 49 50 51 52 13<br>15 min |              | <br>40 41 42 43 44 45 46 47 48 49 50 51 52 13<br>30 min |

| Sample type                          |          | Resin type   |                                                        |              |                                                         |  |
|--------------------------------------|----------|--------------|--------------------------------------------------------|--------------|---------------------------------------------------------|--|
| Human serum                          |          | CL-4B        |                                                        |              |                                                         |  |
| Isolation method                     |          | Bed volumn   |                                                        |              |                                                         |  |
| Regular SEC                          |          | 20 mL        |                                                        |              |                                                         |  |
| Target antigen<br>(Molecular weight) | Fraction | Bright field | Short exposure                                         | Bright field | Long exposure                                           |  |
| ApoB<br>(512 kDa)                    | 1-13     |              | <br>HS 1 2 3 4 5 6 7 8 9 10 11 12 13<br>10 s           |              | <br>HS 1 2 3 4 5 6 7 8 9 10 11 12 13<br>5 min           |  |
| ApoB<br>(512 kDa)                    | 14-26    |              | <br>14 15 16 17 18 19 20 21 22 23 24 25 26HS<br>5 s    |              | <br>14 15 16 17 18 19 20 21 22 23 24 25 26HS<br>5 min   |  |
| ApoB<br>(512 kDa)                    | 27-39    |              | <br>10 27 28 29 30 31 32 33 34 35 36 37 38 39<br>10 s  |              | <br>10 27 28 29 30 31 32 33 34 35 36 37 38 39<br>10 min |  |
| ApoB<br>(512 kDa)                    | 40-52    |              | <br>40 41 42 43 44 45 46 47 48 49 50 51 52 13<br>1 min |              | <br>40 41 42 43 44 45 46 47 48 49 50 51 52 13<br>10 min |  |

| Sample type                       |          | Resin type   |                                                        |              |                                                         |  |
|-----------------------------------|----------|--------------|--------------------------------------------------------|--------------|---------------------------------------------------------|--|
| Human serum                       |          | CL-6B        |                                                        |              |                                                         |  |
| Isolation method                  |          | Bed volumn   |                                                        |              |                                                         |  |
| Regular SEC                       |          | 20 mL        |                                                        |              |                                                         |  |
| Target antigen (Molecular weight) | Fraction | Bright field | Short exposure                                         | Bright field | Long exposure                                           |  |
| Integrin $\beta$ 3 (100 kDa)      | 1-13     |              | <br>HS 1 2 3 4 5 6 7 8 9 10 11 12 13<br>10 s           |              | <br>HS 1 2 3 4 5 6 7 8 9 10 11 12 13<br>10 min          |  |
| Integrin $\beta$ 3 (100 kDa)      | 14-26    |              | <br>14 15 16 17 18 19 20 21 22 23 24 25 26HS<br>1 min  |              | <br>14 15 16 17 18 19 20 21 22 23 24 25 26HS<br>15 min  |  |
| Integrin $\beta$ 3 (100 kDa)      | 27-39    |              | <br>12 27 28 29 30 31 32 33 34 35 36 37 38 39<br>5 min |              | <br>12 27 28 29 30 31 32 33 34 35 36 37 38 39<br>20 min |  |
| Integrin $\beta$ 3 (100 kDa)      | 40-52    |              | <br>40 41 42 43 44 45 46 47 48 49 50 51 52 12<br>1 min |              | <br>40 41 42 43 44 45 46 47 48 49 50 51 52 12<br>20 min |  |
| Syntenin (32 kDa)                 | 1-13     |              | <br>HS 1 2 3 4 5 6 7 8 9 10 11 12 13<br>15 min         |              | <br>HS 1 2 3 4 5 6 7 8 9 10 11 12 13<br>40 min          |  |
| Syntenin (32 kDa)                 | 14-26    |              | <br>14 15 16 17 18 19 20 21 22 23 24 25 26HS<br>15 min |              | <br>14 15 16 17 18 19 20 21 22 23 24 25 26HS<br>40 min  |  |
| Syntenin (32 kDa)                 | 27-39    |              | <br>12 27 28 29 30 31 32 33 34 35 36 37 38 39<br>5 min |              | <br>12 27 28 29 30 31 32 33 34 35 36 37 38 39<br>40 min |  |
| Syntenin (32 kDa)                 | 40-52    |              | <br>40 41 42 43 44 45 46 47 48 49 50 51 52 12<br>5 min |              | <br>40 41 42 43 44 45 46 47 48 49 50 51 52 12<br>40 min |  |

| Sample type                       |          | Resin type   |                                                                               |              |                                                                               |  |
|-----------------------------------|----------|--------------|-------------------------------------------------------------------------------|--------------|-------------------------------------------------------------------------------|--|
| Human serum                       |          | CL-6B        |                                                                               |              |                                                                               |  |
| Isolation method                  |          | Bed volumn   |                                                                               |              |                                                                               |  |
| Regular SEC                       |          | 20 mL        |                                                                               |              |                                                                               |  |
| Target antigen (Molecular weight) | Fraction | Bright field | Short exposure                                                                | Bright field | Long exposure                                                                 |  |
| Albumin (69 kDa)                  | 1-13     |              | <br>HS 1 2 3 4 5 6 7 8 9 10 11 12 13<br>10 s                                  |              | <br>HS 1 2 3 4 5 6 7 8 9 10 11 12 13<br>3 min                                 |  |
| Albumin (69 kDa)                  | 14-26    |              | <br>14 15 16 17 18 19 20 21 22 23 24 25 26HS<br>10 s                          |              | <br>14 15 16 17 18 19 20 21 22 23 24 25 26HS<br>1 min                         |  |
| Albumin (69 kDa)                  | 27-39    |              | <br>12 27 28 29 30 31 32 33 34 35 36 37 38 39<br>1 min                        |              | <br>12 27 28 29 30 31 32 33 34 35 36 37 38 39<br>5 min                        |  |
| Albumin (69 kDa)                  | 40-52    |              | <br>40 41 42 43 44 45 46 47 48 49 50 51 52 12<br>1 min                        |              | <br>40 41 42 43 44 45 46 47 48 49 50 51 52 12<br>5 min                        |  |
| ApoA1 (27 kDa)                    | 1-13     |              | <br>HS 1 2 3 4 5 6 7 8 9 10 11 12 13<br>Unstripped Albumin<br>10 min          |              | <br>HS 1 2 3 4 5 6 7 8 9 10 11 12 13<br>Unstripped Albumin<br>20 min          |  |
| ApoA1 (27 kDa)                    | 14-26    |              | <br>14 15 16 17 18 19 20 21 22 23 24 25 26HS<br>Unstripped Albumin<br>3 min   |              | <br>14 15 16 17 18 19 20 21 22 23 24 25 26HS<br>Unstripped Albumin<br>10 min  |  |
| ApoA1 (27 kDa)                    | 27-39    |              | <br>12 27 28 29 30 31 32 33 34 35 36 37 38 39<br>Unstripped Albumin<br>10 min |              | <br>12 27 28 29 30 31 32 33 34 35 36 37 38 39<br>Unstripped Albumin<br>25 min |  |
| ApoA1 (27 kDa)                    | 40-52    |              | <br>40 41 42 43 44 45 46 47 48 49 50 51 52 12<br>5 min                        |              | <br>40 41 42 43 44 45 46 47 48 49 50 51 52 12<br>40 min                       |  |



| Sample type                          |          | Resin type   |                                                                      |              |                                                                        |  |
|--------------------------------------|----------|--------------|----------------------------------------------------------------------|--------------|------------------------------------------------------------------------|--|
| Human serum                          |          | CL-6B        |                                                                      |              |                                                                        |  |
| Isolation method                     |          | Bed volumn   |                                                                      |              |                                                                        |  |
| Regular SEC                          |          | 20 mL        |                                                                      |              |                                                                        |  |
| Target antigen<br>(Molecular weight) | Fraction | Bright field | Short exposure                                                       | Bright field | Long exposure                                                          |  |
| ApoB<br>(512 kDa)                    | 1-13     |              | <br><small>HS 1 2 3 4 5 6 7 8 9 10 11 12 13</small><br>5 s           |              | <br><small>HS 1 2 3 4 5 6 7 8 9 10 11 12 13</small><br>3 min           |  |
| ApoB<br>(512 kDa)                    | 14-26    |              | <br><small>14 15 16 17 18 19 20 21 22 23 24 25 26 HS</small><br>1 s  |              | <br><small>14 15 16 17 18 19 20 21 22 23 24 25 26 HS</small><br>1 min  |  |
| ApoB<br>(512 kDa)                    | 27-39    |              | <br><small>12 27 28 29 30 31 32 33 34 35 36 37 38 39</small><br>10 s |              | <br><small>12 27 28 29 30 31 32 33 34 35 36 37 38 39</small><br>10 min |  |
| ApoB<br>(512 kDa)                    | 40-52    |              | <br><small>40 41 42 43 44 45 46 47 48 49 50 51 52 12</small><br>10 s |              | <br><small>40 41 42 43 44 45 46 47 48 49 50 51 52 12</small><br>3 min  |  |

| Sample type                       | Protein ladder                       |                          | Verification of protein quantity (10 µg/lane) |              |               |  |
|-----------------------------------|--------------------------------------|--------------------------|-----------------------------------------------|--------------|---------------|--|
| Human serum                       | For integrin β3, ApoA1, CD9 and CD63 | For syntenin and albumin |                                               |              |               |  |
| Isolation method                  |                                      |                          |                                               |              |               |  |
| Dichotomic SEC                    |                                      |                          |                                               |              |               |  |
| Target antigen (Molecular weight) | Protein amount (µg/lane)             | Bright field             | Short exposure                                | Bright field | Long exposure |  |
| Integrin β3 (100 kDa)             | 10                                   |                          | <br>15 s                                      |              | <br>5 min     |  |
| Syntenin (32 kDa)                 | 30                                   |                          | <br>1 min                                     |              | <br>10 min    |  |
| Albumin (69 kDa)                  | 30                                   |                          | <br>10 s                                      |              | <br>1 min     |  |
| ApoA1 (27 kDa)                    | 10                                   |                          | <br>5 s                                       |              | <br>1 min     |  |
| CD9 (25 kDa)                      | 10                                   |                          | <br>10 s                                      |              | <br>60 min    |  |
| CD63 (30-65 kDa)                  | 10                                   |                          | <br>1 min                                     |              | <br>5 min     |  |

| Sample type                       |                          | Protein ladder | Verification of protein quantity (10 µg/lane) |              |               |  |
|-----------------------------------|--------------------------|----------------|-----------------------------------------------|--------------|---------------|--|
| SW620 cell culture supernatant    |                          |                |                                               |              |               |  |
| Isolation method                  |                          |                |                                               |              |               |  |
| Dichotomic SEC                    |                          |                |                                               |              |               |  |
| Target antigen (Molecular weight) | Protein amount (µg/lane) | Bright field   | Short exposure                                | Bright field | Long exposure |  |
| Integrin β3 (100 kDa)             | 10                       |                |                                               |              |               |  |
| CD9 (25 kDa)                      | 5                        |                |                                               |              |               |  |
| CD63 (30-65 kDa)                  | 5                        |                |                                               |              |               |  |
| TSG101 (45 kDa)                   | 10                       |                |                                               |              |               |  |
| Syntenin (32 kDa)                 | 5                        |                |                                               |              |               |  |
| Albumin (69 kDa)                  | 20                       |                |                                               |              |               |  |
